# Supplementary material for: Trends in COVID-19 Vaccine Administration and Effectiveness Through October 2021
Source: PubMed Central journal article supplement (PMC8972031; doi:10.1001/jamanetworkopen.2022.5018), 2022-03-31
Supplement: jamanetwopen-e225018-s001.pdf [file jamanetwopen-e225018-s001.pdf]

## Supplemental Online Content

Winkelman TNA, Rai NK, Bodurtha PJ, et al. Trends in COVID-19 vaccine administration and effectiveness through October 2021. *JAMA Netw Open*. 2022;5(3):e225018.  
doi:10.1001/jamanetworkopen.2022.5018

**eTable 1.** Vaccine Effectiveness for Medically Attended SARS-CoV-2 Infections by Manufacturer

**eTable 2.** Vaccine Effectiveness for SARS-CoV-2–Related Hospitalizations by Manufacturer

**eFigure 1.** Cumulative Percentage Vaccinated by Rurality Among Those 19 to 64 Years of Age and 65 Years of Age and Older

**eFigure 2.** Cumulative Percentage Vaccinated by Social Vulnerability Index Among Those 19 to 64 Years of Age and 65 Years of Age and Older

**eFigure 3.** Vaccine Effectiveness Overall and by Subgroups Based on Time Since Vaccination as Assessed by SARS-CoV-2 Test Positivity and SARS-CoV-2–Related Hospitalizations—August 29 to October 30, 2021

This supplemental material has been provided by the authors to give readers additional information about their work.

| eTable 1. Vaccine Effectiveness for Medically Attended SARS-CoV-2 Infections by Manufacturer |              |            |          |              |          |     |              |              |
|----------------------------------------------------------------------------------------------|--------------|------------|----------|--------------|----------|-----|--------------|--------------|
| Group                                                                                        | Manufacturer | Vaccinated |          | Unvaccinated |          | VE  | VE 95% CI LL | VE 95% CI UL |
|                                                                                              |              | Tested     | Positive | Tested       | Positive |     |              |              |
| All                                                                                          | JSN          | 18041      | 1859     | 286631       | 42204    | 33  | 30           | 37           |
| All                                                                                          | PFR          | 140777     | 10538    | 286631       | 42204    | 53  | 52           | 54           |
| All                                                                                          | MOD          | 93684      | 5169     | 286631       | 42204    | 66  | 65           | 67           |
| Female                                                                                       | JSN          | 9634       | 887      | 150493       | 21381    | 39  | 34           | 43           |
| Female                                                                                       | PFR          | 84727      | 6058     | 150493       | 21381    | 53  | 52           | 55           |
| Female                                                                                       | MOD          | 55894      | 2973     | 150493       | 21381    | 66  | 65           | 67           |
| Male                                                                                         | JSN          | 8407       | 972      | 136138       | 20823    | 28  | 22           | 32           |
| Male                                                                                         | PFR          | 56050      | 4480     | 136138       | 20823    | 52  | 50           | 53           |
| Male                                                                                         | MOD          | 37790      | 2196     | 136138       | 20823    | 66  | 64           | 67           |
| Age 65 and up                                                                                | JSN          | 4704       | 419      | 24526        | 3402     | 39  | 32           | 45           |
| Age 65 and up                                                                                | PFR          | 38521      | 3509     | 24526        | 3402     | 38  | 35           | 41           |
| Age 65 and up                                                                                | MOD          | 40722      | 1938     | 24526        | 3402     | 69  | 67           | 71           |
| Age 45 to 64                                                                                 | JSN          | 6726       | 740      | 39520        | 7271     | 45  | 41           | 49           |
| Age 45 to 64                                                                                 | PFR          | 39364      | 3170     | 39520        | 7271     | 61  | 59           | 63           |
| Age 45 to 64                                                                                 | MOD          | 27653      | 1639     | 39520        | 7271     | 72  | 70           | 74           |
| Age 19 to 44                                                                                 | JSN          | 6476       | 691      | 81695        | 14779    | 46  | 41           | 50           |
| Age 19 to 44                                                                                 | PFR          | 43171      | 3305     | 81695        | 14779    | 62  | 61           | 64           |
| Age 19 to 44                                                                                 | MOD          | 24938      | 1578     | 81695        | 14779    | 69  | 68           | 71           |
| American Indian/Alaska Native MN                                                             | JSN          | 218        | 25       | 3605         | 650      | 41  | 10           | 62           |
| American Indian/Alaska Native MN                                                             | PFR          | 792        | 60       | 3605         | 650      | 63  | 51           | 72           |
| American Indian/Alaska Native MN                                                             | MOD          | 1057       | 69       | 3605         | 650      | 68  | 59           | 75           |
| Asian/PI MN                                                                                  | JSN          | 534        | 55       | 8805         | 833      | -10 | -47          | 18           |
| Asian/PI MN                                                                                  | PFR          | 4956       | 327      | 8805         | 833      | 32  | 23           | 41           |
| Asian/PI MN                                                                                  | MOD          | 2243       | 73       | 8805         | 833      | 68  | 59           | 75           |

|                                                                           |              |            |          |              |          |    |              |              |
|---------------------------------------------------------------------------|--------------|------------|----------|--------------|----------|----|--------------|--------------|
| Black MN                                                                  | JSN          | 1000       | 106      | 31406        | 3778     | 13 | -6           | 29           |
|                                                                           |              | Vaccinated |          | Unvaccinated |          |    |              |              |
| Group                                                                     | Manufacturer | Tested     | Positive | Tested       | Positive | VE | VE 95% CI LL | VE 95% CI UL |
| Black MN                                                                  | PFR          | 7257       | 395      | 31406        | 3778     | 58 | 53           | 62           |
| Black MN                                                                  | MOD          | 4343       | 151      | 31406        | 3778     | 74 | 69           | 78           |
| Hispanic MN                                                               | JSN          | 526        | 63       | 19172        | 2711     | 17 | -8           | 37           |
| Hispanic MN                                                               | PFR          | 5199       | 331      | 19172        | 2711     | 59 | 54           | 63           |
| Hispanic MN                                                               | MOD          | 2442       | 155      | 19172        | 2711     | 59 | 51           | 65           |
| White MN                                                                  | JSN          | 15126      | 1537     | 193725       | 31656    | 42 | 39           | 45           |
| White MN                                                                  | PFR          | 117485     | 9156     | 193725       | 31656    | 57 | 56           | 58           |
| White MN                                                                  | MOD          | 79952      | 4572     | 193725       | 31656    | 69 | 68           | 70           |
| Diabetes                                                                  | JSN          | 2141       | 224      | 11746        | 1859     | 38 | 28           | 46           |
| Diabetes                                                                  | PFR          | 15862      | 1539     | 11746        | 1859     | 43 | 39           | 47           |
| Diabetes                                                                  | MOD          | 13804      | 723      | 11746        | 1859     | 71 | 68           | 73           |
| Hypertension                                                              | JSN          | 4971       | 518      | 27056        | 4301     | 38 | 32           | 44           |
| Hypertension                                                              | PFR          | 37647      | 3533     | 27056        | 4301     | 45 | 43           | 48           |
| Hypertension                                                              | MOD          | 32329      | 1794     | 27056        | 4301     | 69 | 67           | 71           |
| Heart Disease                                                             | JSN          | 2256       | 166      | 10968        | 1276     | 40 | 29           | 49           |
| Heart Disease                                                             | PFR          | 18499      | 1463     | 10968        | 1276     | 35 | 29           | 40           |
| Heart Disease                                                             | MOD          | 17641      | 745      | 10968        | 1276     | 67 | 63           | 70           |
| Cancer                                                                    | JSN          | 1415       | 93       | 7206         | 811      | 45 | 31           | 56           |
| Cancer                                                                    | PFR          | 11014      | 757      | 7206         | 811      | 42 | 35           | 48           |
| Cancer                                                                    | MOD          | 8912       | 405      | 7206         | 811      | 62 | 58           | 67           |
| COPD/Asthma                                                               | JSN          | 3857       | 337      | 33382        | 4610     | 40 | 33           | 47           |
| COPD/Asthma                                                               | PFR          | 27916      | 2004     | 33382        | 4610     | 52 | 49           | 54           |
| COPD/Asthma                                                               | MOD          | 20019      | 941      | 33382        | 4610     | 69 | 67           | 71           |
|                                                                           |              |            |          |              |          |    |              |              |
|                                                                           |              |            |          |              |          |    |              |              |
| Note: MOD, Moderna; PFR, Pfizer; JSN, Janssen; VE, vaccine effectiveness. |              |            |          |              |          |    |              |              |

| eTable 2. Vaccine Effectiveness for SARS-CoV-2–Related Hospitalizations by Manufacturer |              |                      |                  |                      |                  |    |              |              |
|-----------------------------------------------------------------------------------------|--------------|----------------------|------------------|----------------------|------------------|----|--------------|--------------|
|                                                                                         |              | Vaccinated           |                  | Unvaccinated         |                  |    |              |              |
| Group                                                                                   | Manufacturer | Person weeks at risk | Hospitalizations | Person weeks at risk | Hospitalizations | VE | VE 95% CI LL | VE 95% CI UL |
| All                                                                                     | JSN          | 2224734              | 206              | 12847374             | 5485             | 78 | 75           | 81           |
| All                                                                                     | PFR          | 13290171             | 1102             | 12847374             | 5485             | 81 | 79           | 82           |
| All                                                                                     | MOD          | 8992791              | 734              | 12847374             | 5485             | 81 | 79           | 82           |
| Female                                                                                  | JSN          | 1002927              | 105              | 6502524              | 2725             | 75 | 70           | 79           |
| Female                                                                                  | PFR          | 7135878              | 558              | 6502524              | 2725             | 81 | 80           | 83           |
| Female                                                                                  | MOD          | 4921100              | 395              | 6502524              | 2725             | 81 | 79           | 83           |
| Male                                                                                    | JSN          | 1222373              | 101              | 6333672              | 2760             | 81 | 77           | 84           |
| Male                                                                                    | PFR          | 6155906              | 544              | 6333672              | 2760             | 80 | 78           | 82           |
| Male                                                                                    | MOD          | 4072822              | 339              | 6333672              | 2760             | 81 | 79           | 83           |
| Age 65 and up                                                                           | JSN          | 391972               | 87               | 2060310              | 1133             | 60 | 50           | 68           |
| Age 65 and up                                                                           | PFR          | 2791395              | 692              | 2060310              | 1133             | 55 | 50           | 59           |
| Age 65 and up                                                                           | MOD          | 2647700              | 454              | 2060310              | 1133             | 69 | 65           | 72           |
| Age 45 to 64                                                                            | JSN          | 837623               | 74               | 2169771              | 1398             | 86 | 83           | 89           |
| Age 45 to 64                                                                            | PFR          | 4054318              | 225              | 2169771              | 1398             | 91 | 90           | 93           |
| Age 45 to 64                                                                            | MOD          | 3107061              | 180              | 2169771              | 1398             | 91 | 89           | 92           |
| Age 19 to 44                                                                            | JSN          | 954696               | 44               | 4051770              | 1583             | 88 | 84           | 91           |
| Age 19 to 44                                                                            | PFR          | 4491210              | 161              | 4051770              | 1583             | 91 | 89           | 92           |
| Age 19 to 44                                                                            | MOD          | 3163822              | 99               | 4051770              | 1583             | 92 | 90           | 93           |
| American Indian/Alaska Native MN                                                        | JSN          | 9936                 | <11              | 163485               | 270              | 40 | -15          | 70           |
| American Indian/Alaska Native MN                                                        | PFR          | 61613                | 28               | 163485               | 270              | 72 | 59           | 81           |
| American Indian/Alaska Native MN                                                        | MOD          | 88431                | 35               | 163485               | 270              | 76 | 66           | 83           |
| Asian/PI MN                                                                             | JSN          | 98919                | <11              | 428072               | 100              | 85 | 55           | 95           |

|                                                                           |     |          |     |         |      |         |     |     |
|---------------------------------------------------------------------------|-----|----------|-----|---------|------|---------|-----|-----|
| Asian/PI MN                                                               | PFR | 824339   | 22  | 428072  | 100  | 89      | 82  | 93  |
| Asian/PI MN                                                               | MOD | 411412   | <11 | 428072  | 100  | 95      | 85  | 95  |
| Black MN                                                                  | JSN | 103499   | 12  | 1447221 | 483  | 65      | 38  | 80  |
| Black MN                                                                  | PFR | 752624   | 26  | 1447221 | 483  | 90      | 85  | 93  |
| Black MN                                                                  | MOD | 440830   | 24  | 1447221 | 483  | 84      | 75  | 89  |
| Hispanic MN                                                               | JSN | 66553    | <11 | 889956  | 363  | 85      | 60  | 95  |
| Hispanic MN                                                               | PFR | 579412   | 20  | 889956  | 363  | 92      | 87  | 95  |
| Hispanic MN                                                               | MOD | 318371   | 16  | 889956  | 363  | 88      | 80  | 93  |
| White MN                                                                  | JSN | 1797475  | 172 | 9190345 | 4082 | 78      | 75  | 82  |
| White MN                                                                  | PFR | 10397863 | 992 | 9190345 | 4082 | 79      | 77  | 80  |
| White MN                                                                  | MOD | 7236283  | 641 | 9190345 | 4082 | 80      | 78  | 82  |
| Diabetes                                                                  | JSN | 129471   | 52  | 857796  | 639  | 46      | 28  | 59  |
| Diabetes                                                                  | PFR | 900965   | 272 | 857796  | 639  | 59      | 53  | 65  |
| Diabetes                                                                  | MOD | 718042   | 181 | 857796  | 639  | 66      | 60  | 71  |
| Hypertension                                                              | JSN | 369912   | 98  | 2117451 | 1233 | 55      | 44  | 63  |
| Hypertension                                                              | PFR | 2439743  | 558 | 2117451 | 1233 | 61      | 57  | 64  |
| Hypertension                                                              | MOD | 1948911  | 410 | 2117451 | 1233 | 64      | 60  | 68  |
| Heart Disease                                                             | JSN | 92353    | 62  | 1036670 | 463  | -<br>50 | -96 | -15 |
| Heart Disease                                                             | PFR | 732592   | 345 | 1036670 | 463  | -5      | -21 | 8   |
| Heart Disease                                                             | MOD | 638186   | 247 | 1036670 | 463  | 13      | -1  | 26  |
| Cancer                                                                    | JSN | 91023    | 21  | 626852  | 235  | 38      | 4   | 61  |
| Cancer                                                                    | PFR | 669191   | 171 | 626852  | 235  | 32      | 17  | 44  |
| Cancer                                                                    | MOD | 510129   | 93  | 626852  | 235  | 51      | 38  | 62  |
| COPD/Asthma                                                               | JSN | 226555   | 75  | 1992756 | 1002 | 34      | 17  | 48  |
| COPD/Asthma                                                               | PFR | 1533243  | 398 | 1992756 | 1002 | 48      | 42  | 54  |
| COPD/Asthma                                                               | MOD | 1062205  | 230 | 1992756 | 1002 | 57      | 50  | 63  |
|                                                                           |     |          |     |         |      |         |     |     |
|                                                                           |     |          |     |         |      |         |     |     |
| Note: MOD, Moderna; PFR, Pfizer; JSN, Janssen; VE, vaccine effectiveness. |     |          |     |         |      |         |     |     |

**eFigure 1.** Cumulative Percentage Vaccinated by Rurality Among Those 19 to 64 Years of Age and 65 Years of Age and Older

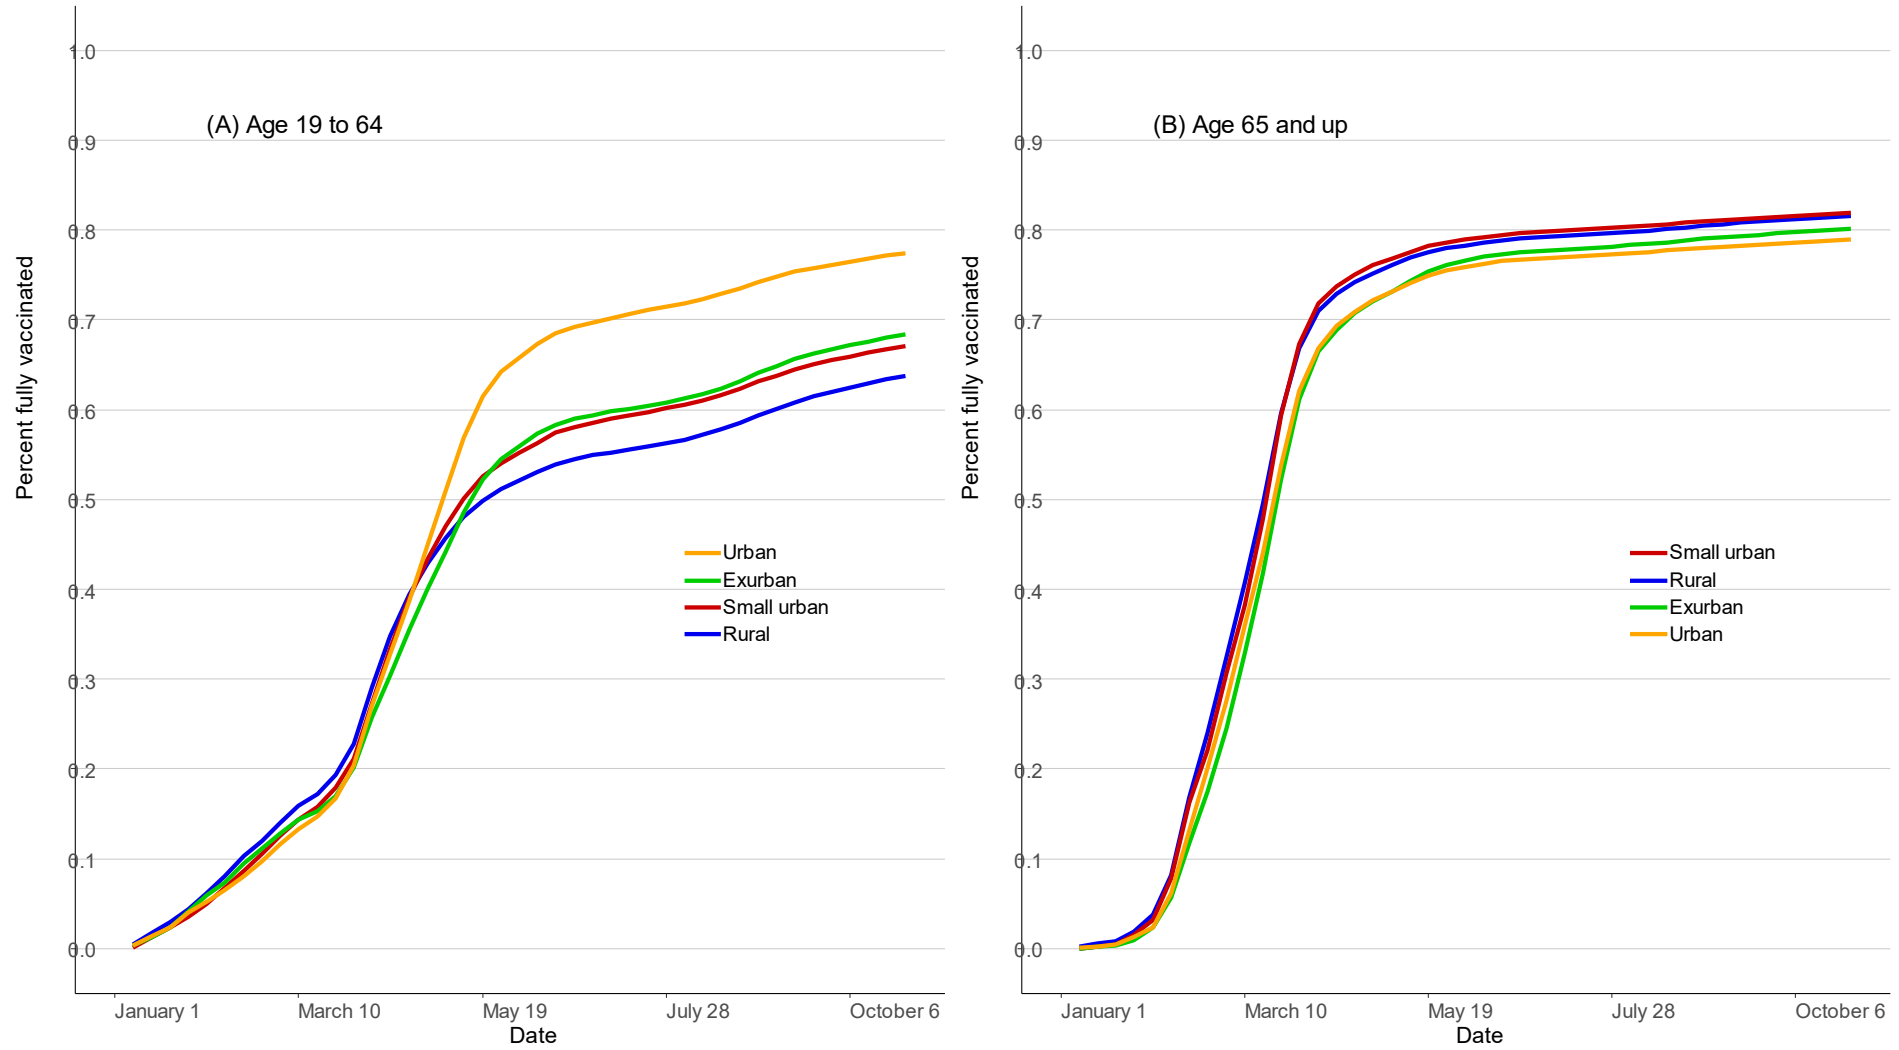

**eFigure 2.** Cumulative Percentage Vaccinated by Social Vulnerability Index Among Those 19 to 64 Years of Age and 65 Years of Age and Older

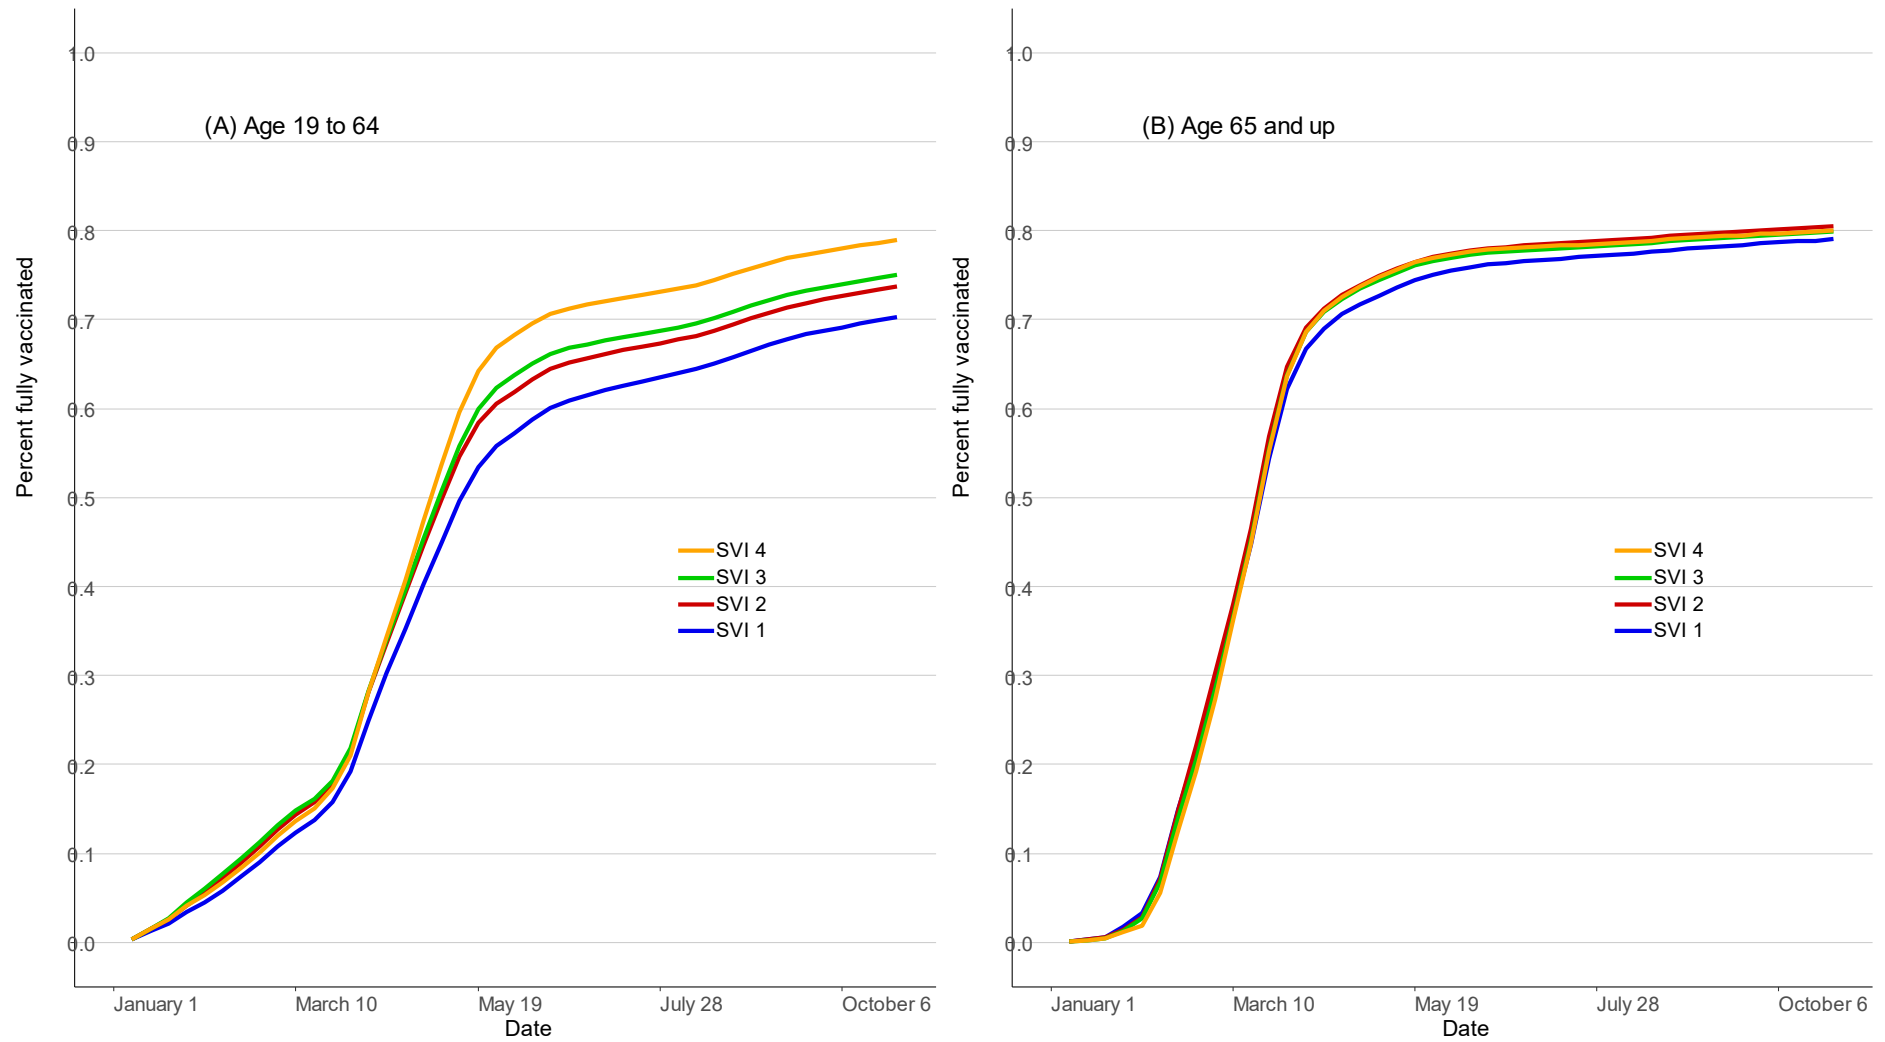

**eFigure 3.** Vaccine Effectiveness Overall and by Subgroups Based on Time Since Vaccination as Assessed by SARS-CoV-2 Test Positivity and SARS-CoV-2–Related Hospitalizations—August 29 to October 30, 2021

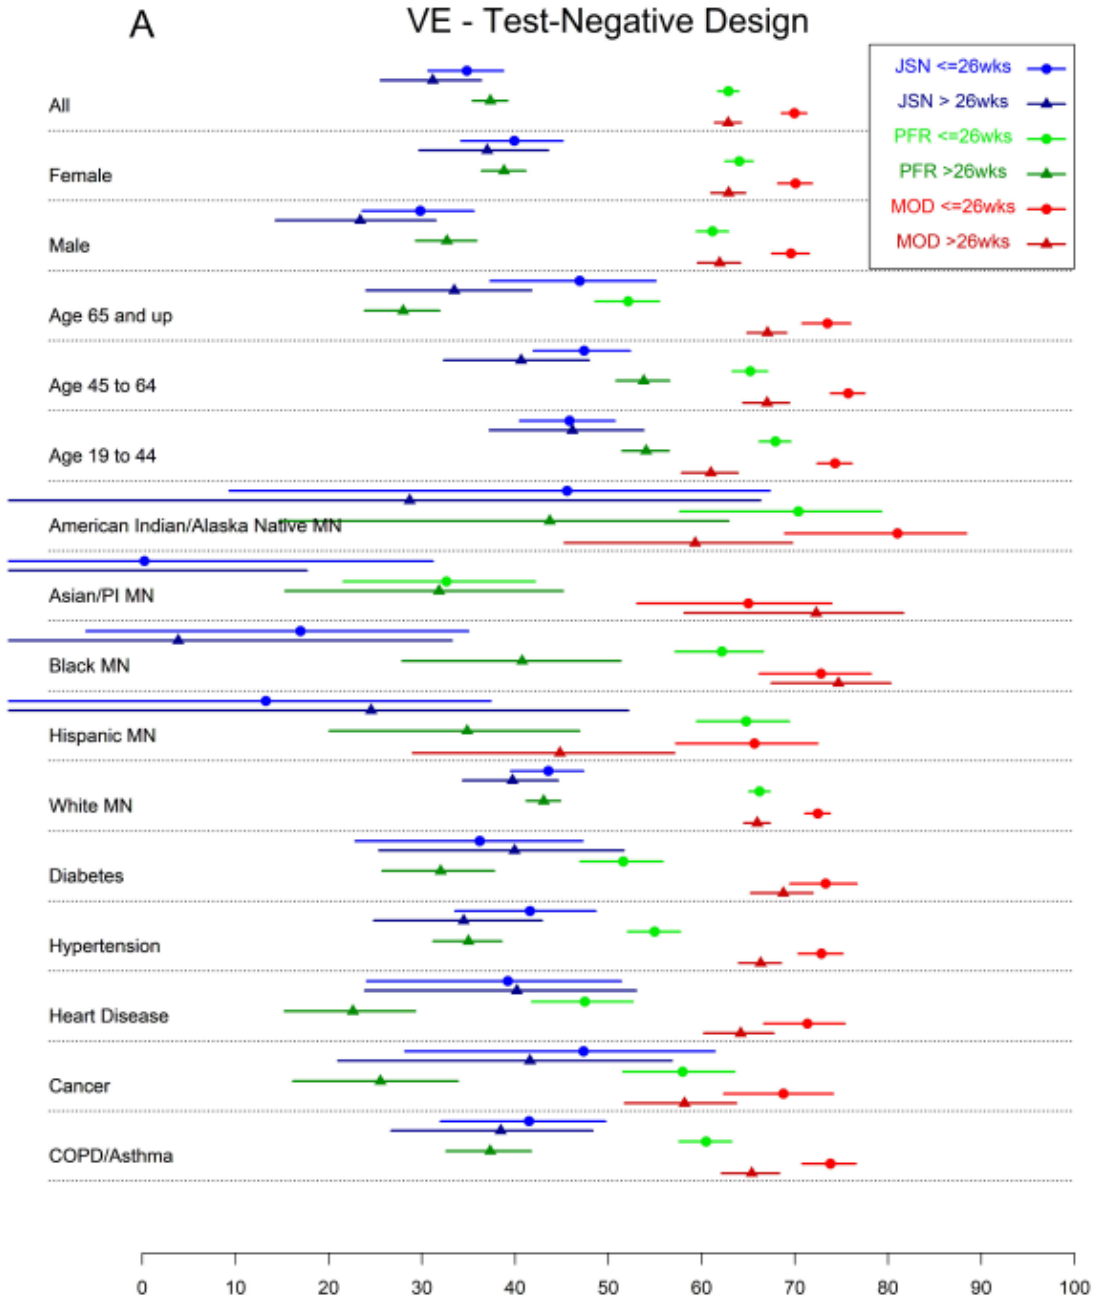

Note. Top (lighter color) line for each manufacturer is for the period 2 to 26 weeks after vaccination, bottom (darker) line is for the period more than 26 weeks after vaccination.



**eFigure 3 continued.** Vaccine Effectiveness Overall and by Subgroups Based on Time Since Vaccination as Assessed by SARS-CoV-2 Test Positivity and SARS-CoV-2–Related Hospitalizations—August 29 to October 30, 2021

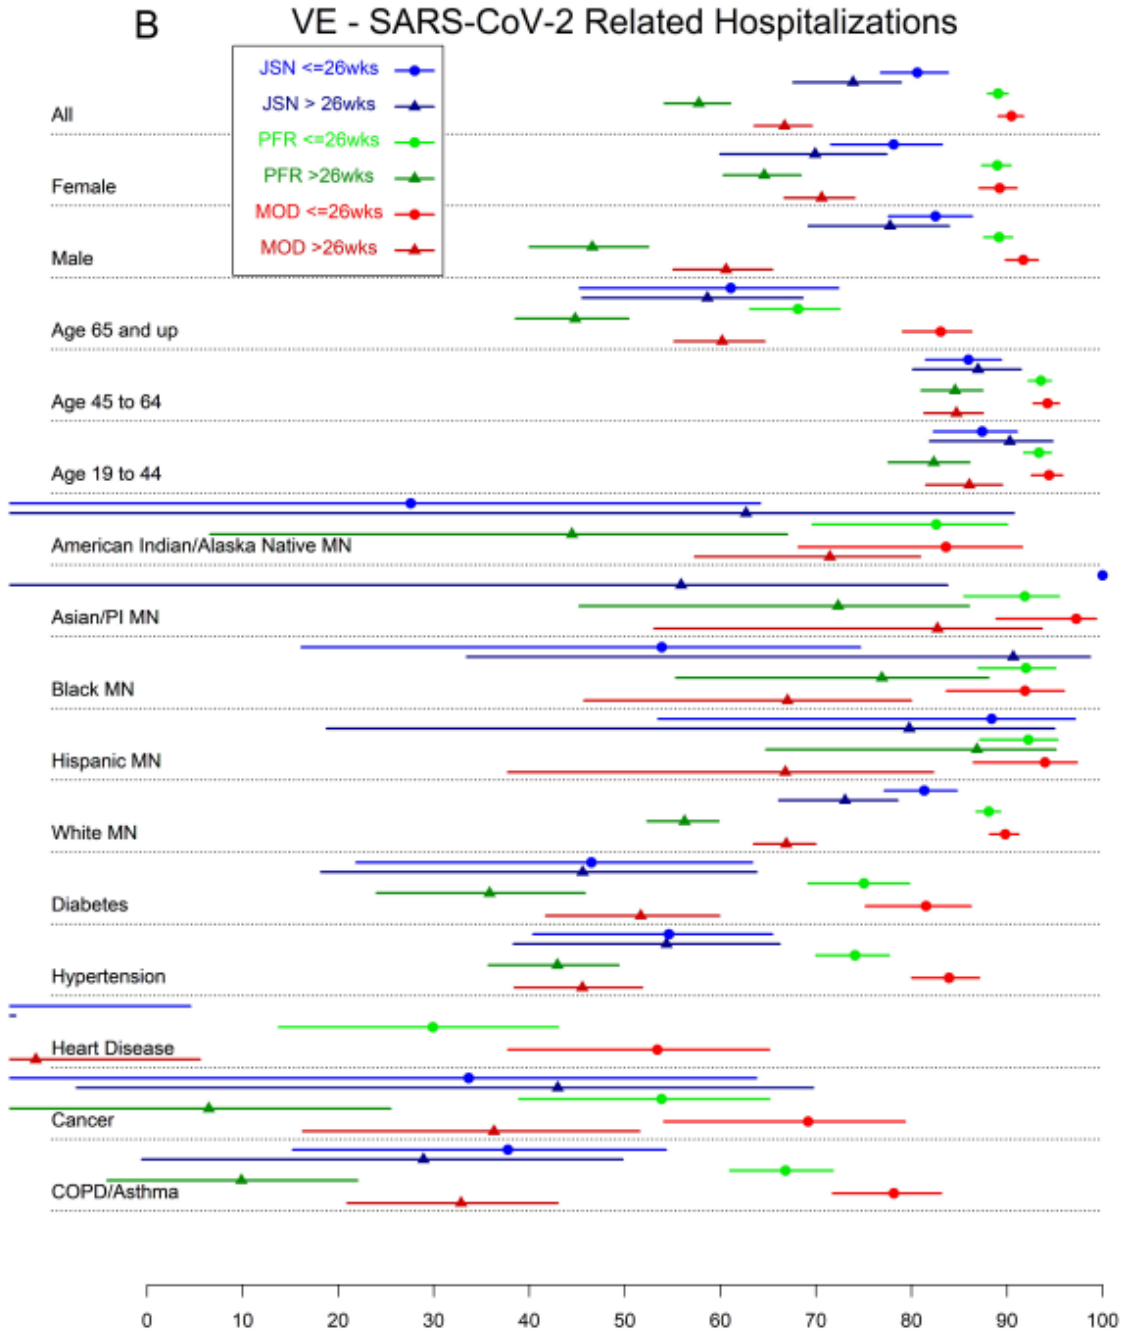

Note. Top (lighter color) line for each manufacturer is for the period 2 to 26 weeks after vaccination, bottom (darker) line is for the period more than 26 weeks after vaccination
